# Supplementary material
Source: MDPI journal article supplement (https://www.mdpi.com/2073-4395/12/11/2606)
Supplement: s1 [file s1]

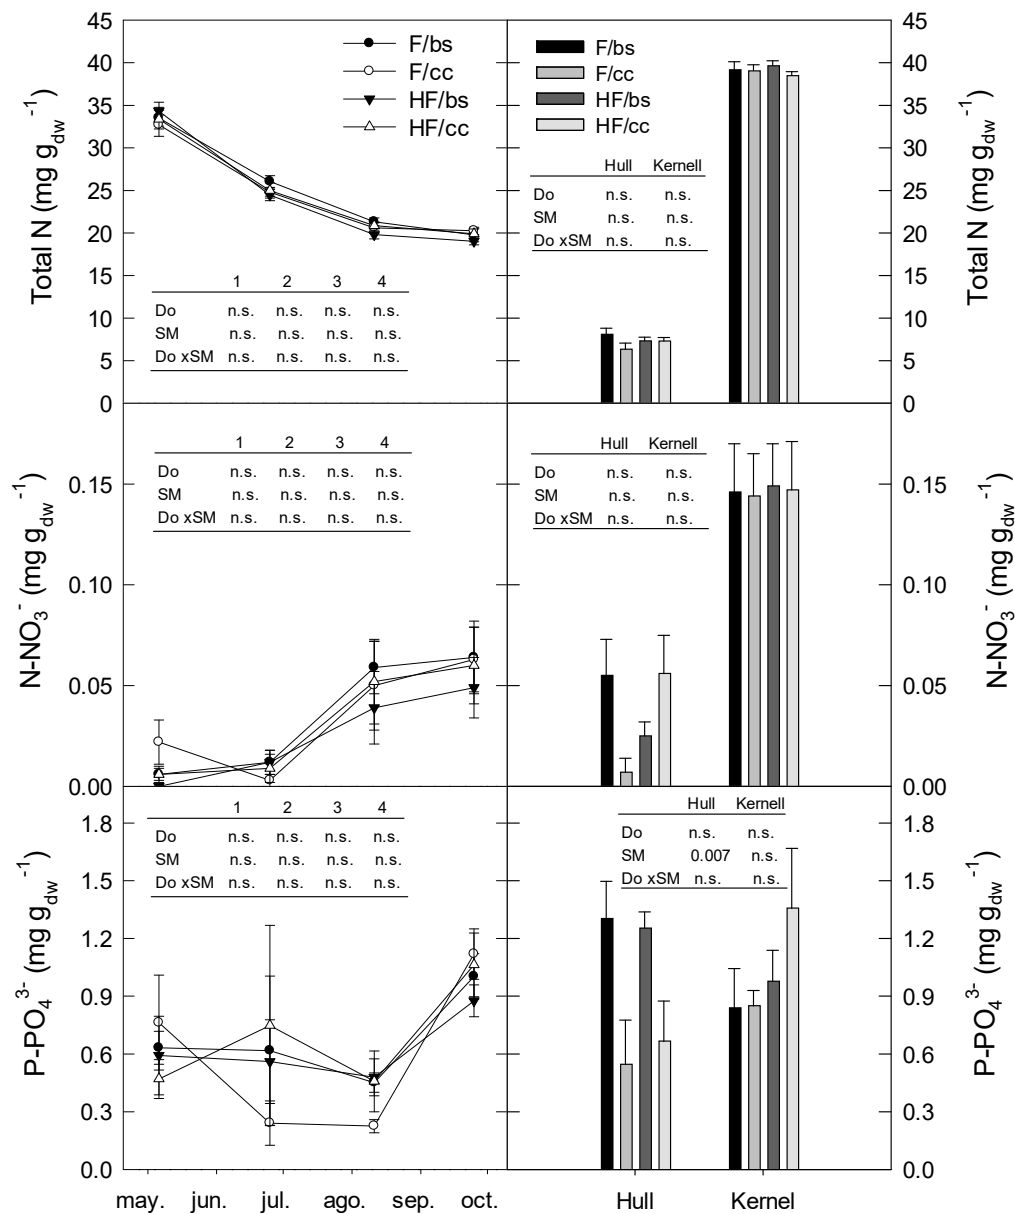

**Supplemental Figure S1.** Effects of the fertilization dose (Do)(farmer (F) and half farmer (HF)) and soil management (SM) (bare soil (bs) and cover crops (cc)) and its interactions on the total N, N-NO<sub>3</sub><sup>-</sup> and P-PO<sub>4</sub><sup>3-</sup> concentration in leaves, hull and kernel tissue in the 2020 season. Numbers 1 to 4 indicated the leaf harvest sample date; 6 April, 25 June, 11 August and 25 September, respectively. Data shows the mean  $\pm$  standard error. N.s., means that the factor analyzed is not significant, and when significant the p-value is included.

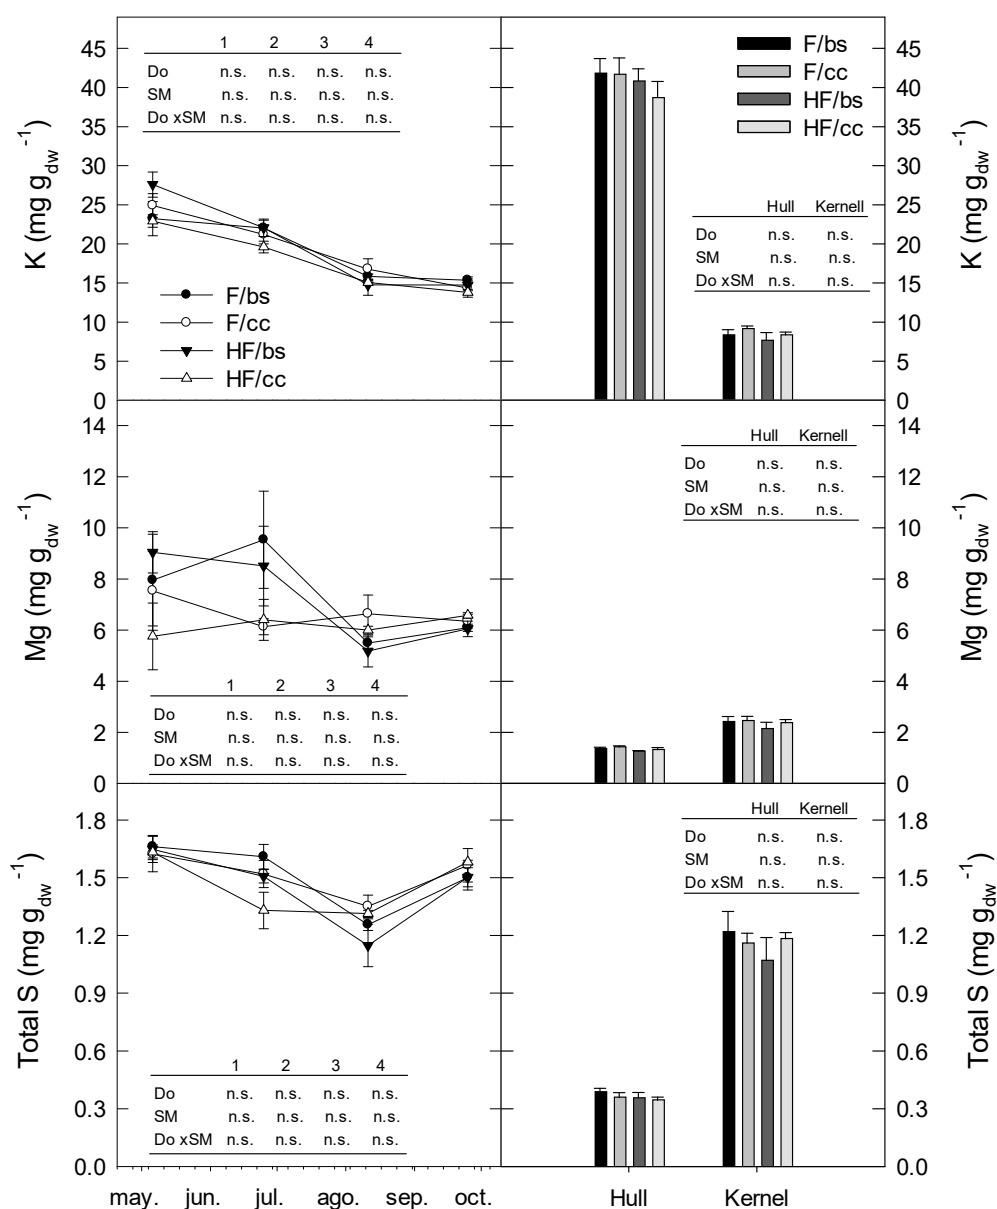

**Supplemental Figure S2.** Effects of the fertigation dose (Do)(farmer (F) and half farmer (HF)) and soil management (SM) (bare soil (bs) and cover crops (cc)) and its interactions on the K, Mg and total S concentration in leaves, hull and kernel tissue in the 2020 season. Numbers 1 to 4 indicated the leaf harvest sample date; 6 April, 25 June, 11 August and 25 September, respectively. Data shows the mean  $\pm$  standard error. N.s., means that the factor analyzed is not significant, and when significant the p-value is included.

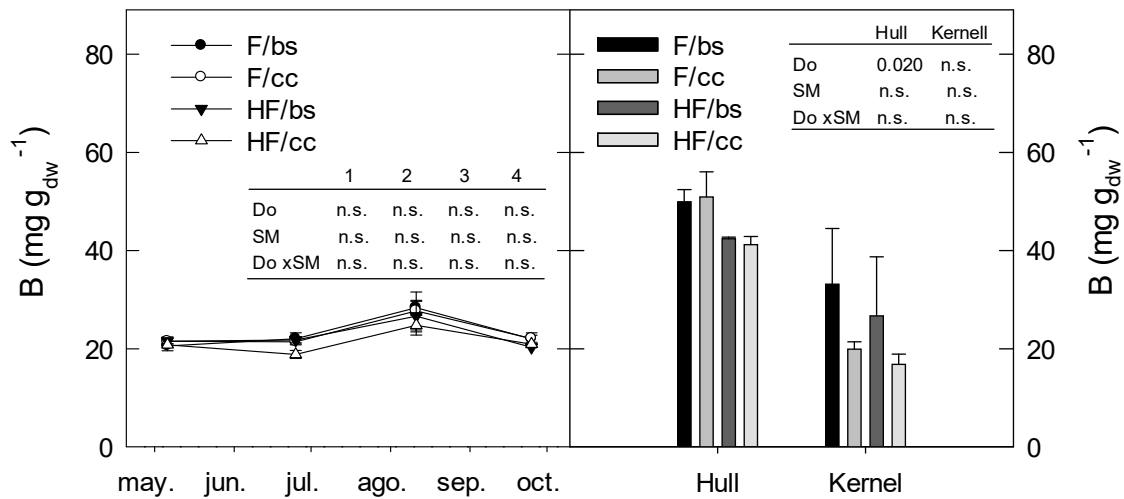

**Supplemental Figure S3.** Effects of the fertilization dose (Do)(farmer (F) and half farmer (HF)) and soil management (SM) (bare soil (bs) and cover crops (cc)) and its interactions on B concentration in leaves, hull and kernel tissue in the 2020 season. Numbers 1 to 4 indicated the leaf harvest sample date; 6 April, 25 June, 11 August and 25 September, respectively. Data shows the mean  $\pm$  standard error. N.s., means that the factor analyzed is not significant, and when significant the p-value is included.

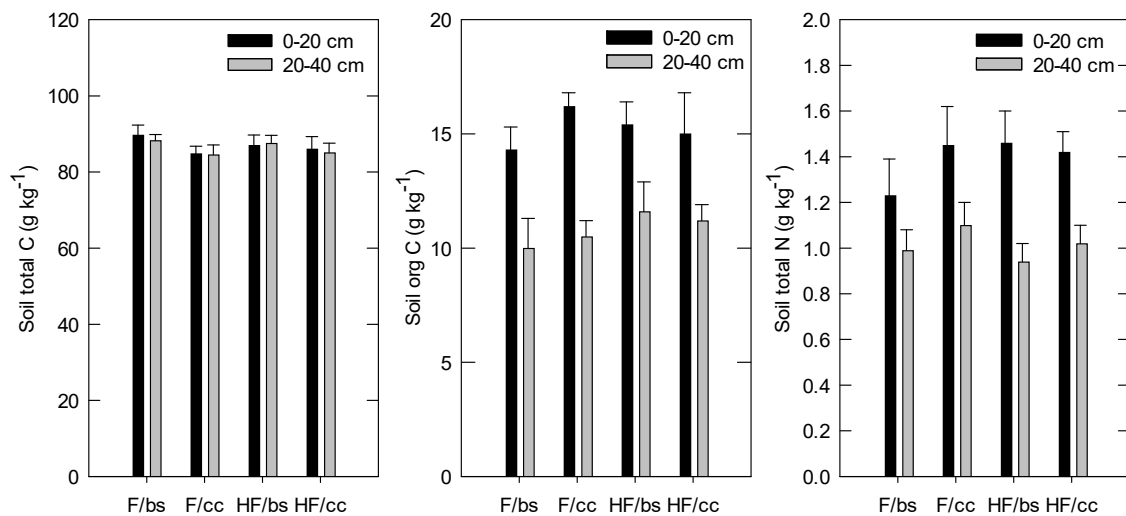

**Supplemental Figure S4.** Effects of the fertilization dose (farmer (F) and half farmer (HF)) and soil management (bare soil (bs) and cover crops (cc)) on the soil total C, org C and total N concentration at two depths. Data shows the mean  $\pm$  standard error.
